# Supplementary material for: Authentication of organic sugars by NIR spectroscopy and partial least squares with discriminant analysis
Source: Royal Society of Chemistry journal article supplement (doi:10.1039/c9ay02025j), 2019-12-16
Supplement: c9ay02025j1.pdf [file c9ay02025j1.pdf]

### Supplementary material

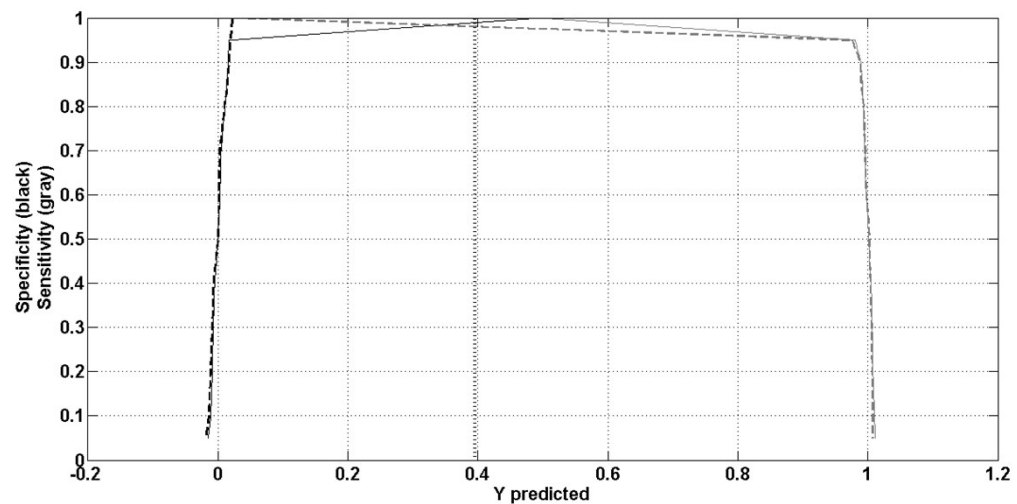

**Figure 1S.** ROC curve for organic sugar crystal. Solid lines correspond to the predicted values from PLS-DA model. Dashed lines correspond to the cross-validation predicted values (contiguous block of 5 samples). The vertical pointed black bold line corresponds to the threshold value of 0.3953.

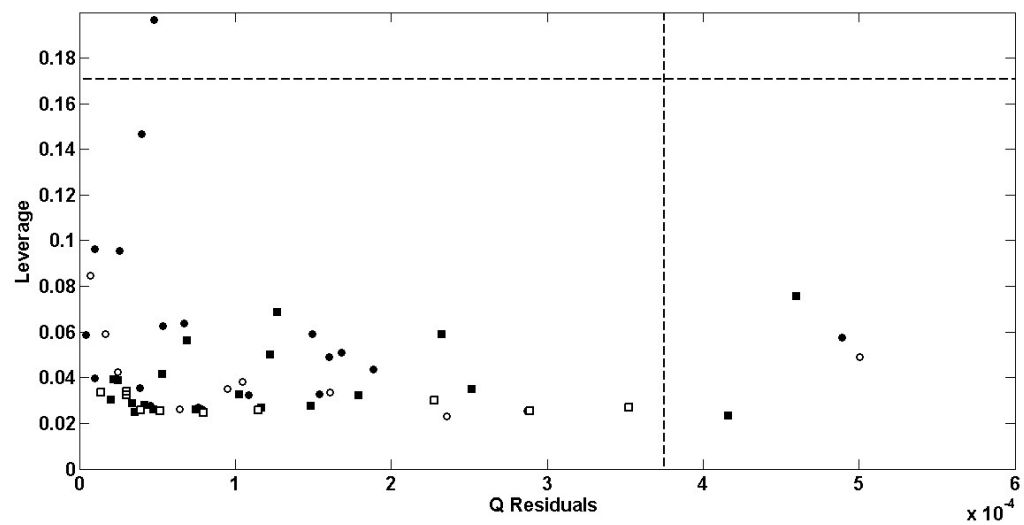

**Figure 2S.** Q residuals against leverage for the crystal sugar PLS-DA model. (●) organic samples in training (○) organic samples in validation. (■) conventional samples in training. (□) conventional samples in validation.
